# Supplementary material for: The rational design of novel chiral oxovanadium(iv) complexes for highly enantioselective oxidative coupling of 2-naphtholsElectronic supplementary information (ESI) available: general; representative procedure for the preparation of the complexes and coupling of 2-naphthols; HRMS spectra of 2b–d; HPLC spectra of 4a–c. See http://www.rsc.org/suppdata/cc/b2/b201351g/
Source: Royal Society of Chemistry journal article supplement (doi:10.1039/b201351g), 2002-03-26
Supplement: b201351g.doc [file b201351g.doc]

**Supplementary Material (ESI) for Chemical Communications**

**This journal is © The Royal Society of Chemistry 2002**

**The Rational Design of Novel Chiral Oxovanadium(IV) Complexes for highly Enantioselective Oxidative Coupling of 2-Naphthols**

Zhibin Luo, Quanzhong Liu, Liuzhu Gong,* Xin Cui, Aiqiao Mi and Yaozhong Jiang

Union Laboratory of Asymmetric Synthesis, Chengdu Institute of Organic Chemistry, Chinese Academy of Sciences, Chengdu, 610041, China; E-mail: gonglz@cioc.ac.cn

**General:** NMR spectra were recorded on a Brucker-300MHz spectrometer. EI Mass spectra were recorded on VG-7010E. HPLC analysis was performed on Beckman 110B chromatography with Beckman 168 variable wavelength detector. Kromasil CHI-TBB column was purchased from Eka Chemicals AB. CCl4 was dried with CaH2. Petroleum ether (PE) and ethyl acetate for column chromatography were distilled before use.

## Representative procedure for the preparation of the complexes:

A two-neck round bottom flask (50 mL) was charged -amino acid (10 mmol), anhydrous NaOAc (20 mmol) and water (10 mL). After stirred at 60 ℃ under Ar atmosphere for 10 min to generate a clear solution, the reaction mixture was treated with a solution of (*R*)-3,3’-diformyl-2,2’-dihydroxy- 1,1’-bi-2-naphthol (5 mmol) in EtOH (15 mL) and THF (15 mL). The reaction mixture was heated at 80℃ for 15min, and then was gradually cooled down to 25 ℃ for 2 h. To the resultant Schiff base solution was added a solution of vanadyl sulfate trihydrate (10 mmol) in water (5 mL). The reaction mixture was stirred for another 2 h and then concentrated. The crude vanadyl complex was collected by filtration and washed sequentially with H2O (5×25 mL) and cool ether (3×25 mL), and then dried in vacuum to provide the complexesas a dark green solid.

Data for **2b**: IR (cm-1): νC=N (1675), νC=O (1611), νV=O (988)

MS: 762 (M-, 20), 717 (M-C2H5OH+H+, 100)

Data for **2c**: IR (cm-1): νC=N (1685), νC=O (1613), νV=O (982)

MS: 783 (M- C2H5OH+K+, 100), 737(M- 2C2H5OH+K+, 38)

Data for **2d**: IR (cm-1): νC=N (1657), νC=O (1610), νV=O (985).

## Representative procedure for the coupling of 2-naphthols

A two-neck round bottom flask (5 mL) was charged with a solution of catalyst **2c** (16 mg, 0.02 mmol) in anhydrous CCl4 (1 mL). The solution was stirred for 10 min under an oxygen atmosphere and then treated with a solution of 2-naphthol (29 mg, 0.2 mmol) in anhydrous CCl4 (1 mL). The reaction mixture was stirred at 0 ℃ until the reaction was complete (monitored by TLC), the crude mixture concentrated under reduced pressure, and purified by column chromatography (Ethyl acetate/Petroleum ether=1/3) to give (R)-BINOL **4a**.

**4a:** Yield 86%, 1H NMR (300MHz, CDCl3)  (ppm) 7.98 (d, *J*=9.0 Hz, 2H, 2×HC (4)), 7.90 (d, *J*=7.8 Hz, 2H, 2×HC (5)), 7.38 (d, *J*=9.0 Hz, 2H, 2×HC (8)), 7.41-7.27 (m, 4H, 2×HC (6), 2×HC (7)), 7.16 (d, *J*=8.4Hz, 2H, 2×HC (3)), 5.09 (s, 2H, 2×OH). The enantiomeric excess of 83% with *R*-isomer major was determined by HPLC (Kromasil CHI-TBB column, Hexane/ propan-2-ol= 4: 1; flow rate 1 mL/ min; *S*-isomer, *tR* 5.81 min and *R*-isomer, *tR* 6.44 min)

**4b:** Yield 98%, 1H NMR (300MHz, CDCl3)  (ppm) 7.88 (d, *J*=9.0 Hz, 2H, 2×HC (5)), 7.79(d, *J*=9.0 Hz, 2H, 2×HC (4)), 7.22 (d, *J*=8.7 Hz, 2H, 2×HC (3)), 7.03 (dd, *J*=9.0 Hz, 2.4 Hz, 2H, 2×HC (6)), 6.49 (d, *J*=2.4 Hz, 2H, 2×HC (8)), 5.08 (s, 2H, 2×OH), 3.59 (s, 6H, 2×OCH3). The enantiomeric excess of 98% with *R*-isomer major was determined by HPLC (Kromasil CHI-TBB column, Hexane/ propan-2-ol= 4: 1; flow rate 1 mL/ min; *S*-isomer, *tR* 5.88 min and *R*-isomer, *tR* 6.38 min).

**4c:** Yield 99%, 1H NMR (300MHz, CDCl3)  (ppm) 8.06 (d, *J*=1.8 Hz, 2H, 2×HC (4)), 7.89(d, *J*=9.0 Hz, 2H, 2×HC (5)), 7.37 (d, *J*=6.9 Hz, 2H, 2×HC (8)), 7.36 (dd, *J*=9.0 Hz, 1.8Hz, 2H, 2×HC (7)), 6.96 (d, *J*=9.0 Hz, 2H, 2×HC (3)), 5.08 (s, 2H, 2×OH). The enantiomeric excess of 88% with *R*-isomer major was determined by HPLC (Kromasil CHI-TBB column, Hexane/ propan-2-ol= 4: 1; flow rate 1 mL/ min; *S*-isomer, *tR* 7.72 min and *R*-isomer, *tR* 8.76 min)

### The HPLC Spectra of 4a-c


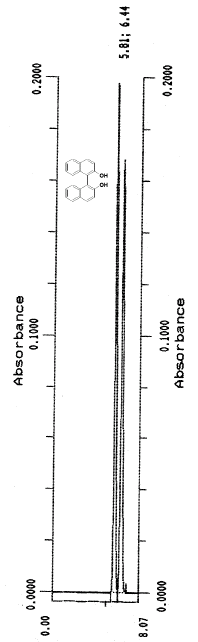

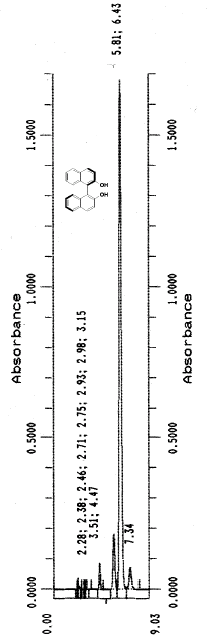


**Rac-4a** **4a E.e. = 83%**

**
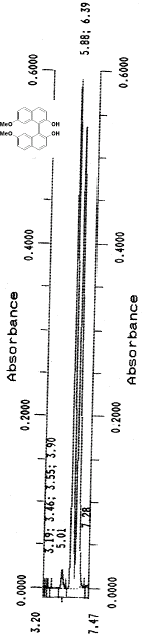

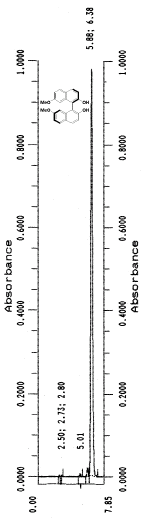
**

**Rac.-4b 4b E.e. = 98%**

**
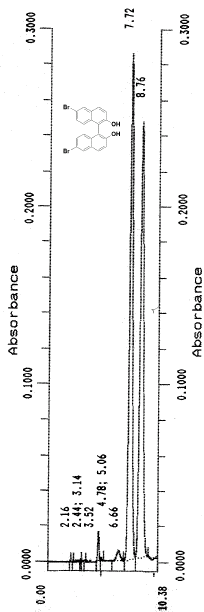

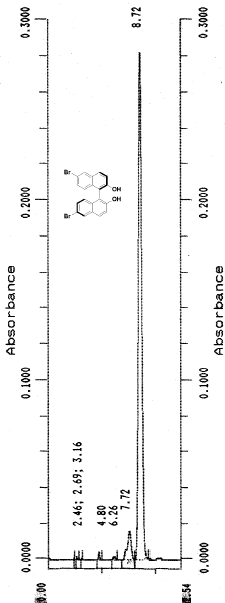
**

**Rac-4c 4c: E.e. = 88%**
